# Supplementary material
Source: HighWire-hosted journal article supplement (https://bjo.bmj.com/highwire/filestream/234395/field_highwire_adjunct_files/0/bjo-2021-321005supp001_data_supplement.pdf)

**SUPPLEMENTARY MATERIAL****Supplementary Table 1.** Characteristics of Test 1 and Test 2 lenses

|                                | <b>Test 1</b>                                                               | <b>Test 2</b>                                            | <b>Control</b>                           |
|--------------------------------|-----------------------------------------------------------------------------|----------------------------------------------------------|------------------------------------------|
| Lens Type                      | Single vision DOT with<br>~5 mm clear centre<br>aperture                    | Single vision DOT with<br>~5 mm<br>clear centre aperture | Standard single vision<br>lens with tint |
| DOT Pattern                    | Pattern 1                                                                   | Pattern 2                                                | None                                     |
| Tint                           | None                                                                        | None                                                     | Light standard green tint<br>(LTF: ~95%) |
| Lens Material                  | Trivex (impact resistant)                                                   |                                                          |                                          |
| Powers available for study (D) | Sphere: -0.75 to -6.00 (0.25 steps)<br>Cylinder: 0.00 to -2.00 (0.25 steps) |                                                          |                                          |

D, diopter; DOT, Diffusion Optics Technology; LTF, light transmission factor

**Supplementary Table 2.** Criteria for balancing randomization

| <b>Age (years)</b> | <b>Lower baseline SER</b> | <b>Higher baseline SER</b> |
|--------------------|---------------------------|----------------------------|
| 6 to <7            | -0.75 to -2.25 D          | <-2.25 to -4.50 D          |
| 7 to <9            | -0.75 to -2.50 D          | <-2.50 to -4.50 D          |
| 8 to <9            | -0.75 to -2.50 D          | <-2.50 to -4.50 D          |
| 9 to <10           | -0.75 to -2.50 D          | <-2.50 to -4.50 D          |
| 10 to <11          | -0.75 to -2.50 D          | <-2.50 to -4.50 D          |

SER, spherical equivalent refraction.

**Supplementary Table 3.** Reasons for Discontinuation Among Subjects Dispensed Spectacles

| Treatment Arm/<br>Subject | Age/SER<br>Group at<br>Baseline | Days Since<br>Dispensing | Reason for Discontinuation                                                                                                                                                                                                                                                                                                                                                                           |
|---------------------------|---------------------------------|--------------------------|------------------------------------------------------------------------------------------------------------------------------------------------------------------------------------------------------------------------------------------------------------------------------------------------------------------------------------------------------------------------------------------------------|
| <i>Test 1</i>             |                                 |                          |                                                                                                                                                                                                                                                                                                                                                                                                      |
| #1                        | 9/Low                           | 184                      | At the discretion of the Investigator or the Subject                                                                                                                                                                                                                                                                                                                                                 |
| #2                        | 9/Low                           | 189                      | Other - Lost to follow up                                                                                                                                                                                                                                                                                                                                                                            |
| #3                        | 9/Low                           | 357                      | Other – Lost to follow up                                                                                                                                                                                                                                                                                                                                                                            |
| #4                        | 7/High                          | 7                        | Other - Parent states study glasses were impeding schoolwork and ability to see normal in everyday wear and with football                                                                                                                                                                                                                                                                            |
| #5                        | 7/High                          | 26                       | Other - Subject wants transition lenses; the provided sunglasses fell off her face; withdrew consent                                                                                                                                                                                                                                                                                                 |
| <i>Test 2</i>             |                                 |                          |                                                                                                                                                                                                                                                                                                                                                                                                      |
| #1                        | 9/Low                           | 29                       | At the discretion of the Investigator or the Subject                                                                                                                                                                                                                                                                                                                                                 |
| #2                        | 6/Low                           | 36                       | At the discretion of the Investigator or the Subject                                                                                                                                                                                                                                                                                                                                                 |
| #3                        | 9/Low                           | 59                       | At the discretion of the Investigator or the Subject                                                                                                                                                                                                                                                                                                                                                 |
| #4                        | 10/Low                          | 183                      | At the discretion of the Investigator or the Subject                                                                                                                                                                                                                                                                                                                                                 |
| #5                        | 9/Low                           | 3                        | Non-compliance to Protocol                                                                                                                                                                                                                                                                                                                                                                           |
| #6                        | 8/Low                           | 240                      | Non-compliance to Protocol                                                                                                                                                                                                                                                                                                                                                                           |
| #7                        | 9/High                          | 374                      | Other - 'bullying at school'                                                                                                                                                                                                                                                                                                                                                                         |
| #8                        | 9/High                          | 3                        | Other - Finds it very difficult to adapt to the peripheral lens pattern and keep finding the clear central zone                                                                                                                                                                                                                                                                                      |
| #9                        | 8/Low                           | 210                      | Other - Lost to follow up                                                                                                                                                                                                                                                                                                                                                                            |
| #10                       | 8/Low                           | 520                      | Other - Lost to follow up (Subject never showed up for last two visits and not answering phone calls/texts)                                                                                                                                                                                                                                                                                          |
| #11                       | 6/Low                           | 30                       | Other - Mother decided to withdraw from study based on look of lenses and comments her daughter made about "just letting her eyes be free" needing a small break. Mother had a difficult time adjusting to how the lenses changed her daughter's appearance and how she was looked at by the general public, indicated they treated her as she was special needs solely on appearance of her glasses |
| #12                       | 10/Low                          | 37                       | Other - Mother indicated subject was having a hard time adapting to the new lenses. Reported it was a struggle to get subject to wear her glasses on a daily basis.                                                                                                                                                                                                                                  |
| #13                       | 8/Low                           | 162                      | Other - Parent and Child wanted to withdraw from the study because child does not like to continue wearing the study product.                                                                                                                                                                                                                                                                        |

| Treatment Arm/<br>Subject | Age/SER<br>Group at<br>Baseline | Days Since<br>Dispensing | Reason for Discontinuation                                                                                                               |
|---------------------------|---------------------------------|--------------------------|------------------------------------------------------------------------------------------------------------------------------------------|
| #14                       | 6/Low                           | 33                       | Other - Parents are unhappy with the lens appearance and wish to discontinue child. Child stated she'd rather have her old glasses back. |
| #15                       | 7/Low                           | 190                      | Other - Subject did not like the pattern on the study spectacles                                                                         |
| #16                       | 7/High                          | 10                       | Other - subject no longer wants to be in the study, did not like glasses                                                                 |
| #17                       | 9/High                          | 43                       | Other - Subject withdrew assent, Early Exit                                                                                              |
| <i>Control</i>            |                                 |                          |                                                                                                                                          |
| #1                        | 6/Low                           | 30                       | Subject does not meet eligibility criteria                                                                                               |
| #2                        | 10/Low                          | 78                       | Subject does not meet eligibility criteria                                                                                               |

SER, spherical equivalent refraction

**Supplementary Table 4.** Parent Questionnaire Responses

| Variable                                                                                                            | Baseline     |              |               | 12-month     |              |               |
|---------------------------------------------------------------------------------------------------------------------|--------------|--------------|---------------|--------------|--------------|---------------|
|                                                                                                                     | Test 1<br>88 | Test 2<br>75 | Control<br>95 | Test 1<br>78 | Test 2<br>56 | Control<br>91 |
| <b>Habitual user?</b>                                                                                               |              |              |               |              |              |               |
| Yes, n (%)                                                                                                          | 79 (89.8)    | 66 (88.0)    | 83 (87.4)     | 78 (100)     | 56 (100)     | 91 (100)      |
| Days typically worn during the week, mean (SD)                                                                      | 4.8 (0.71)   | 4.9 (0.32)   | 5 (0.25)      | 4.9 (0.47)   | 4.9 (0.53)   | 5.0 (0.00)    |
| Daily wearing time (hrs) during the week, mean (SD)                                                                 | 12.7 (4.17)  | 13.3 (3.88)  | 12.9 (4.26)   | 12.8 (2.37)  | 12.9 (2.37)  | 13.6 (2.20)   |
| Days typically worn during the weekend, mean (SD)                                                                   | 1.8 (0.36)   | 1.9 (0.35)   | 1.9 (0.34)    | 2.0 (0.16)   | 2.0 (0.19)   | 2.0 (0.00)    |
| Daily wearing time (hrs) during the weekend, mean (SD)                                                              | 11.9 (4.83)  | 12.6 (4.70)  | 12.3 (5.37)   | 12.8 (2.60)  | 12.4 (3.52)  | 13.5 (2.51)   |
| <b>Spectacles removed for near vision activities?</b>                                                               |              |              |               |              |              |               |
| Yes, n (% of habitual users)                                                                                        | 15 (19.0)    | 15 (22.7)    | 21 (25.3)     | 15 (19.2)    | 23 (41.1)    | 17 (18.7)     |
| <b>If Yes, which activities? n (% of habitual users)<sup>1</sup></b>                                                |              |              |               |              |              |               |
| Reading/Writing                                                                                                     | 5 (6.3)      | 12 (18.2)    | 11 (13.3)     | 9 (11.5)     | 13 (23.2)    | 5 (5.5)       |
| PC/Tablet/Phone                                                                                                     | 4 (5.1)      | 6 (9.1)      | 4 (4.8)       | 3 (3.8)      | 7 (12.5)     | 7 (7.7)       |
| Sports                                                                                                              | 5 (6.3)      | 1 (1.5)      | 6 (7.2)       | 4 (5.1)      | 2 (3.6)      | 3 (3.3)       |
| TV                                                                                                                  | 0 (0)        | 0 (0)        | 0 (0)         | 0 (0)        | 0 (0)        | 0 (0)         |
| Recess/Play Time                                                                                                    | 2 (2.5)      | 0 (0)        | 1 (1.2)       | 0 (0)        | 0 (0)        | 1 (1.1)       |
| Other                                                                                                               | 3 (3.8)      | 0 (0)        | 2 (2.4)       | 2 (2.6)      | 3 (5.4)      | 2 (2.2)       |
| <b>How often does your child complain about glare? (0=Never, 1=Occasionally, 2=Quite often, 3=Very often)</b>       |              |              |               |              |              |               |
| Mean (SD)                                                                                                           | 0.3 (0.47)   | 0.3 (0.54)   | 0.3 (0.61)    | 0.2 (0.38)   | 0.2 (0.40)   | 0.1 (0.22)    |
| <b>How severe is your child's glare? (0=Not at all, 1=Mild; 2=Moderate; 3=Severe)</b>                               |              |              |               |              |              |               |
| Mean (SD)                                                                                                           | 0.2 (0.49)   | 0.3 (0.55)   | 0.3 (0.55)    | 0.2 (0.39)   | 0.2 (0.48)   | 0.1 (0.37)    |
| <b>How often does your child complain about halos? (0=Never, 1=Occasionally, 2=Quite often, 3=Very often)</b>       |              |              |               |              |              |               |
| Mean (SD)                                                                                                           | 0.1 (0.27)   | 0.1 (0.43)   | 0.1 (0.44)    | 0.1 (0.39)   | 0.2 (0.47)   | 0.1 (0.31)    |
| <b>How severe are your child's halos? (0=Not at all, 1=Mild; 2=Moderate; 3=Severe)</b>                              |              |              |               |              |              |               |
| Mean (SD)                                                                                                           | 0.1 (0.35)   | 0.1 (0.41)   | 0.1 (0.35)    | 0.1 (0.37)   | 0.2 (0.52)   | 0.1 (0.28)    |
| <b>How often does your child complain about hazy vision? (0=Never, 1=Occasionally, 2=Quite often, 3=Very often)</b> |              |              |               |              |              |               |
| Mean (SD)                                                                                                           | 0.3 (0.56)   | 0.3 (0.56)   | 0.2 (0.48)    | 0.2 (0.40)   | 0.2 (0.47)   | 0.1 (0.31)    |
| <b>How severe is your child's hazy vision? (0=Not at all, 1=Mild; 2=Moderate; 3=Severe)</b>                         |              |              |               |              |              |               |
| Mean (SD)                                                                                                           | 0.3 (0.65)   | 0.2 (0.49)   | 0.2 (0.45)    | 0.1 (0.35)   | 0.2 (0.46)   | 0.1 (0.28)    |
| <sup>1</sup> Opened-ended question, more than one activity may have been mentioned                                  |              |              |               |              |              |               |

**Supplementary Table 5:** Summary of AL and cycloplegic SER change by visit (observed) - mITT Subjects.

| Variable                             | Test 1       | Test 2       | Control      |
|--------------------------------------|--------------|--------------|--------------|
| <b>AL</b>                            |              |              |              |
| <i>Baseline</i>                      |              |              |              |
| No. of Subjects                      | 88           | 75           | 93           |
| Mean (SD)                            | 24.1 (0.82)  | 23.9 (0.70)  | 24.0 (0.78)  |
| <i>Month 12</i>                      |              |              |              |
| No. of Subjects                      | 79           | 56           | 91           |
| Mean (SD)                            | 24.3 (0.89)  | 24.2 (0.77)  | 24.3 (0.78)  |
| <i>Month 12 Change from Baseline</i> |              |              |              |
| No. of Subjects                      | 79           | 56           | 91           |
| Mean (SD)                            | 0.15 (0.15)  | 0.18 (0.21)  | 0.30 (0.17)  |
| <b>cycloSER</b>                      |              |              |              |
| <i>Baseline</i>                      |              |              |              |
| No. of Subjects                      | 88           | 75           | 93           |
| Mean (SD)                            | -2.00 (0.93) | -1.85 (0.91) | -1.95 (1.02) |
| <i>Month 12 cycloSER</i>             |              |              |              |
| No. of Subjects                      | 78           | 56           | 91           |
| Mean (SD)                            | -2.15 (1.08) | -2.10 (1.09) | -2.45 (1.09) |
| <i>Month 12 Change from Baseline</i> |              |              |              |
| No. of Subjects                      | 78           | 56           | 91           |
| Mean (SD)                            | -0.15 (0.39) | -0.23 (0.49) | -0.53 (0.46) |

AL, axial length; mITT, modified intent-to treat; SER, spherical equivalent refraction

**Supplementary Figure 1.** Diffusion Optics Technology (DOT) spectacles

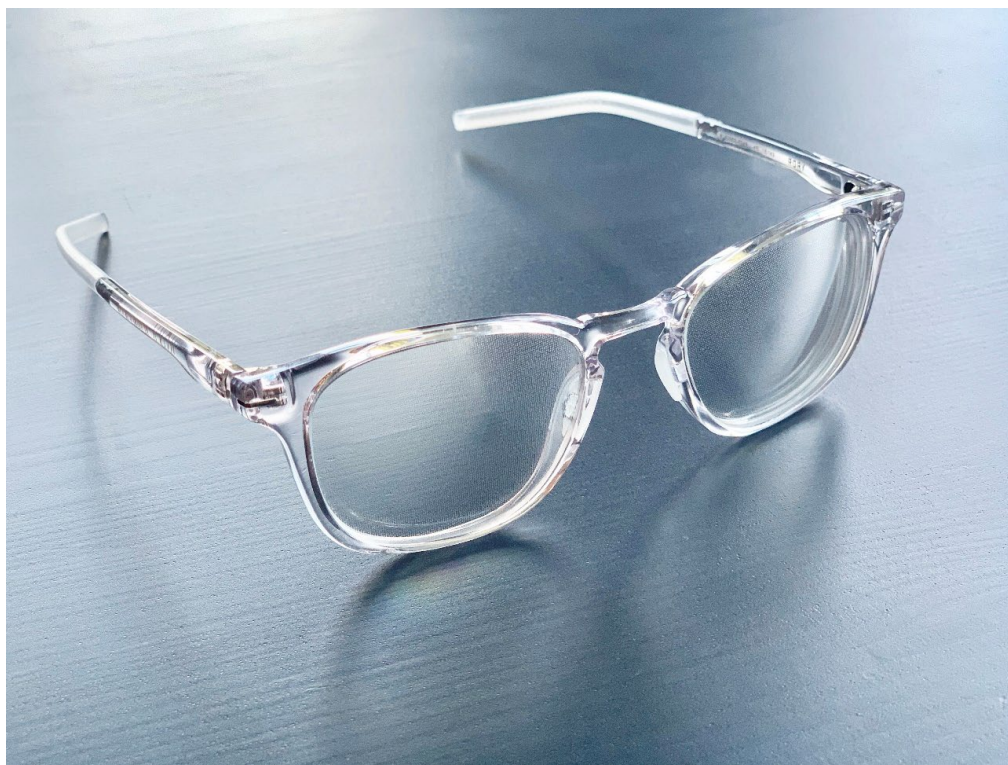

**Supplementary Figure 2.** Validated spectral transmission data: control lenses

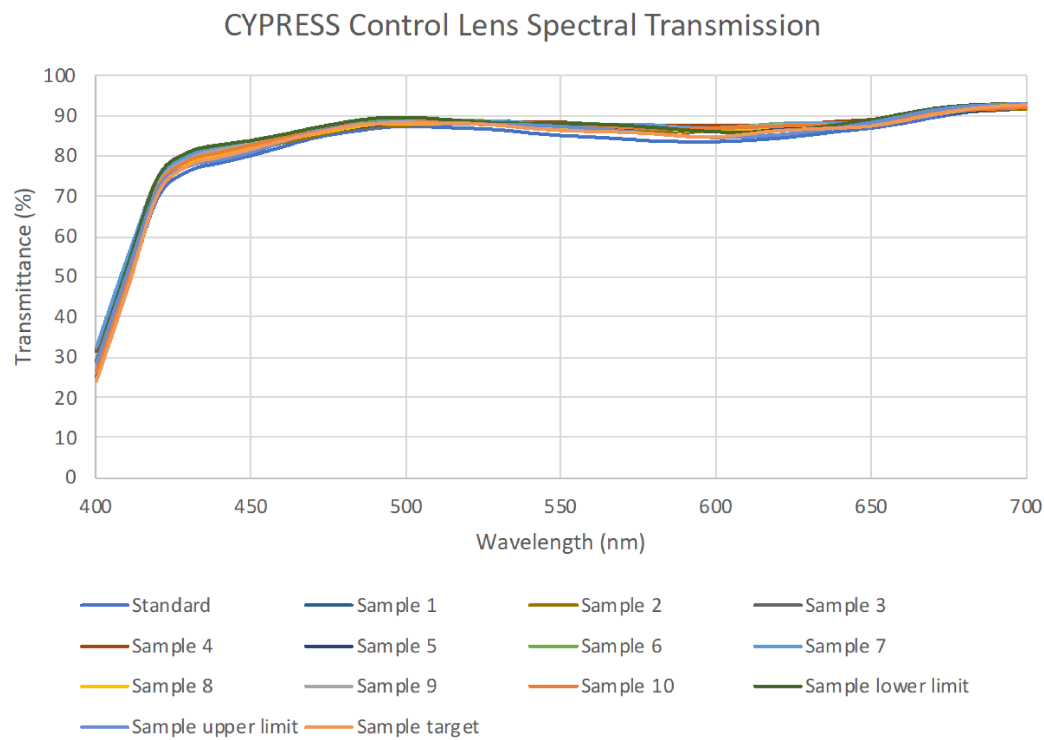

**Supplementary Figure 3.** Subject disposition.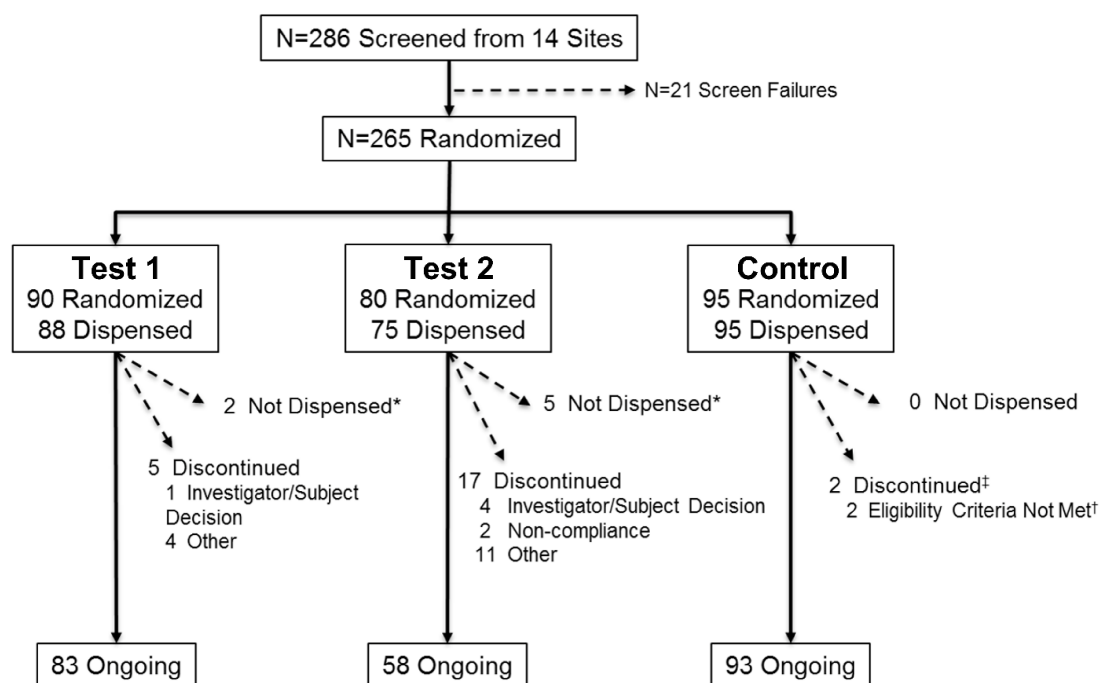

\* Not dispensed due to investigator/subject discretion (two in Test 1), noncompliance (1 in Test 2) and other (2 each in Test 1 and Test 2)

†Two Control subjects were identified as hyperopic for the cycloplegic autorefraction at baseline.



**Supplementary Figure 4.** Plot of uncorrected axial length (A) and spherical equivalent refraction (B) at baseline and follow-up by treatment group

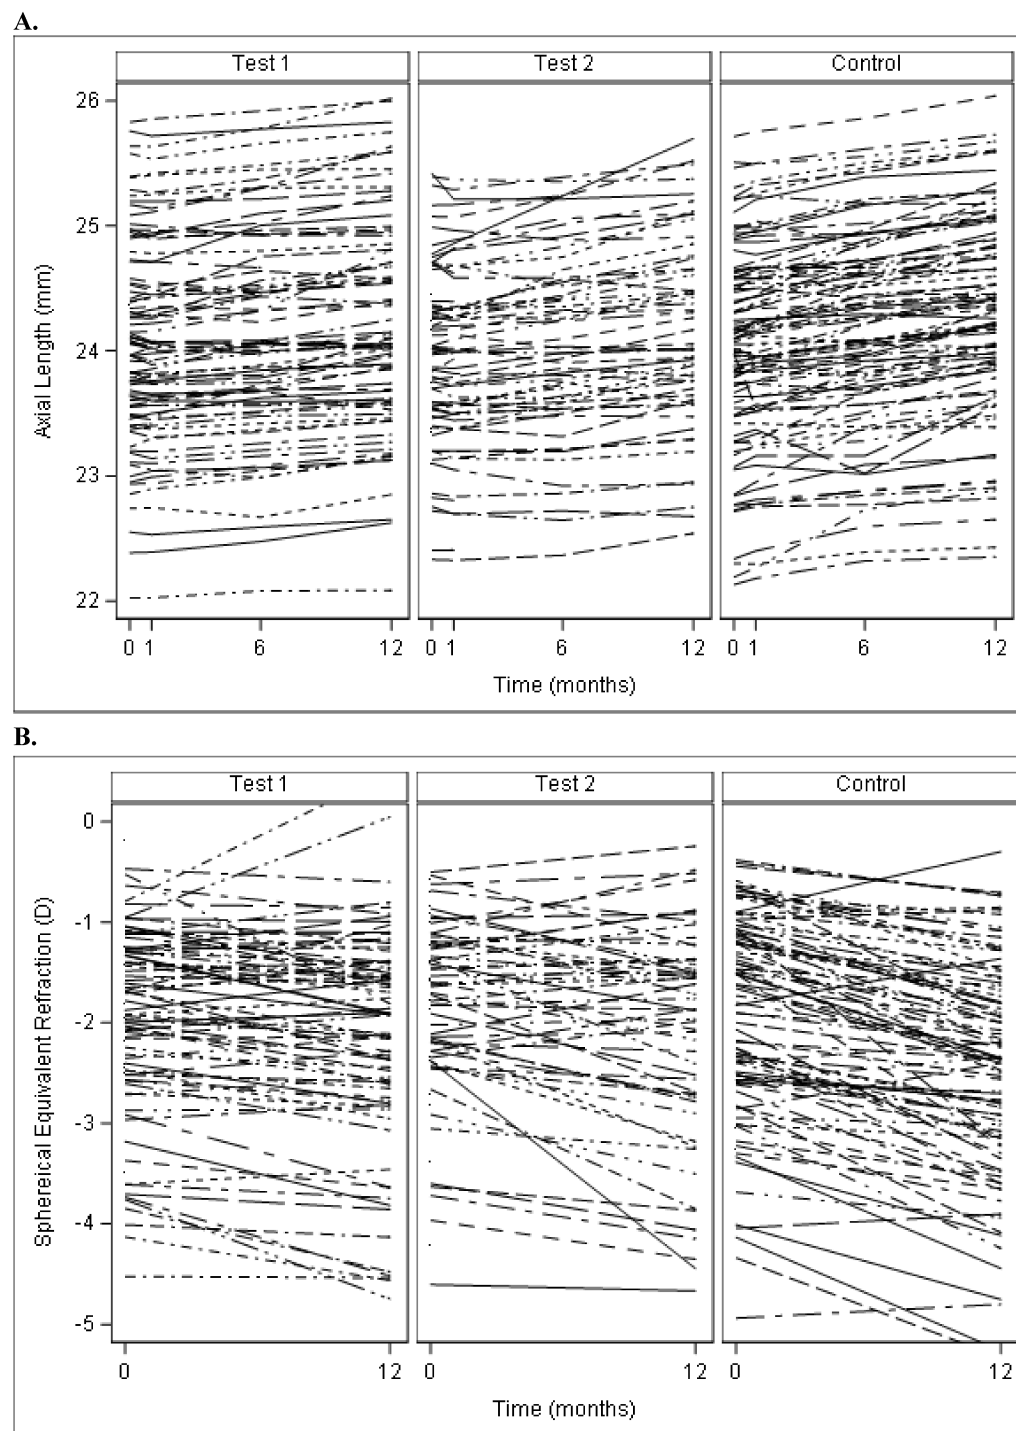

Supplement: bjo-2021-321005supp001_data_supplement.pdf [file bjo-2021-321005supp001_data_supplement.pdf]
